# Supplementary material for: Effects of Thymoquinone on Small-Molecule Metabolites in a Rat Model of Cerebral Ischemia Reperfusion Injury Assessed using MALDI-MSI
Source: PubMed Central journal article supplement (PMC7023359; doi:10.3390/metabo10010027), 2020-01-07
Supplement: metabolites-10-00027-s001.pdf [file metabolites-10-00027-s001.pdf]

# Effects of Thymoquinone on Small-Molecule Metabolites in a Rat Model of Cerebral Ischemia Reperfusion Injury Assessed using MALDI-MSI

Fang Tian <sup>1,2</sup>, Runzhe Liu <sup>1,2</sup>, Chaoxin Fan <sup>1,2</sup>, Yi Sun <sup>1,2</sup>, Xi Huang <sup>3,4</sup>, Zongxiu Nie <sup>3,4</sup>, Xin Zhao <sup>1,2</sup>, and Xiaoping Pu <sup>1,2\*</sup>

1 National Key Research Laboratory of Natural and Biomimetic Drugs, Peking University, Beijing 100191, China

2 Department of Molecular and Cellular Pharmacology, School of Pharmaceutical Sciences, Peking University, Beijing 100191, China

3 Key Laboratory of Analytical Chemistry for Living Biosystems, Institute of Chemistry Chinese Academy of Sciences, Beijing 100190, China

4 Beijing National Laboratory for Molecular Sciences, Beijing 100190, China

\* Correspondence: [pxp123@bjmu.edu.cn](mailto:pxp123@bjmu.edu.cn); Tel: +86-10-82802431

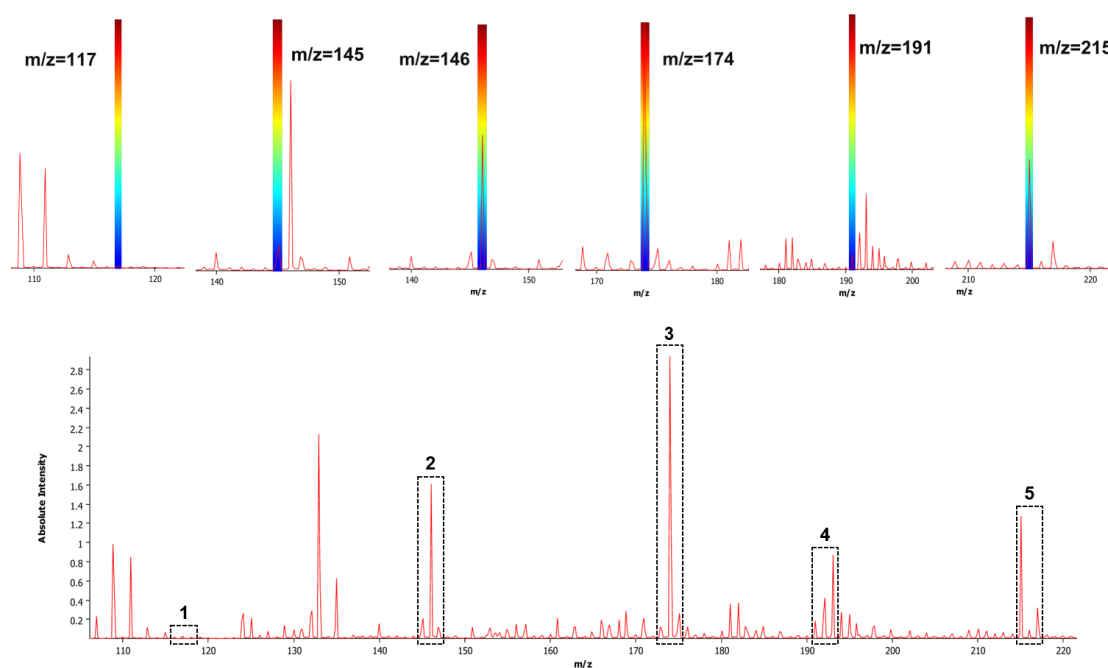

Figure S1. Negative ion mode mass spectrum of aerobic oxidation-related molecules and amino acids using a 1, 5-DAN hydrochloride matrix. Whole mass spectrometry ion peak map with  $m/z$  ranging from 110 to 220. Black rectangular areas in the whole mass spectrometry were amplified and displayed. 1: Succinate  $m/z=117$ , 2: Glutamine  $m/z=145$  and Glutamate  $m/z=146$ , 3: N-acetyl-L-aspartate  $m/z=174$ , 4: Citric acid  $m/z=191$ , 5: Glucose  $m/z=215$ .

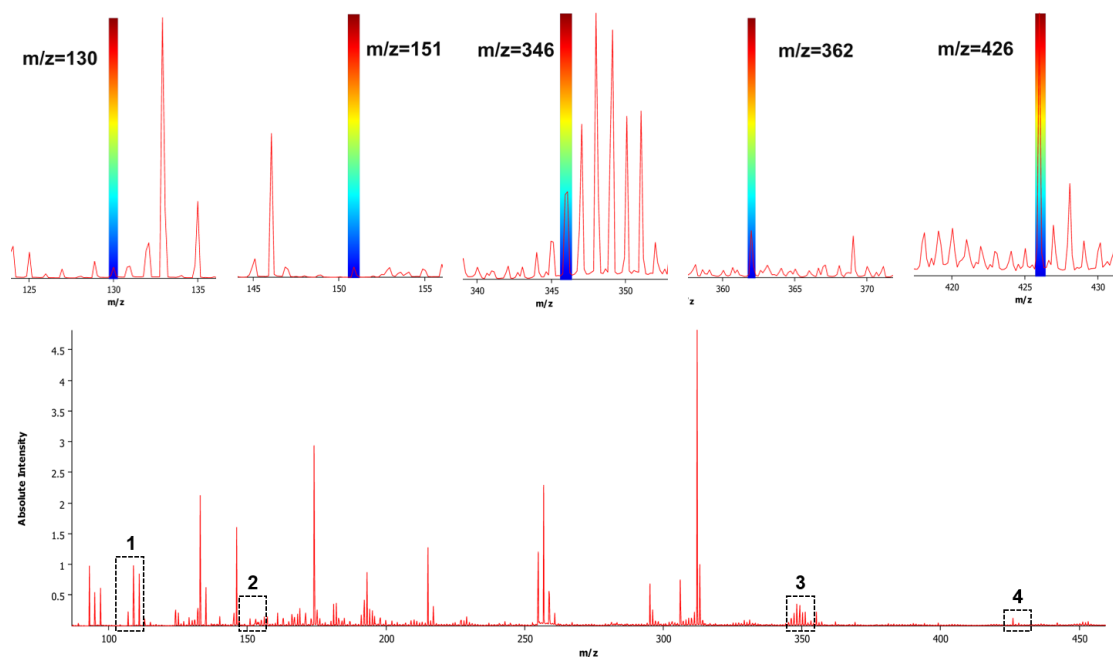

Figure S2. Negative ion mode mass spectrum of energy metabolism-related molecules using a 1, 5-DAN hydrochloride matrix. Whole mass spectrometry ion peak map with  $m/z$  ranging from 100 to 450. Black rectangular areas in the whole mass spectrometry were amplified and displayed. 1: Creatine  $m/z=130$ , 2: Xanthine  $m/z=151$ , 3: AMP  $m/z=346$  and GMP  $m/z=362$ , 4: ADP  $m/z=426$ .

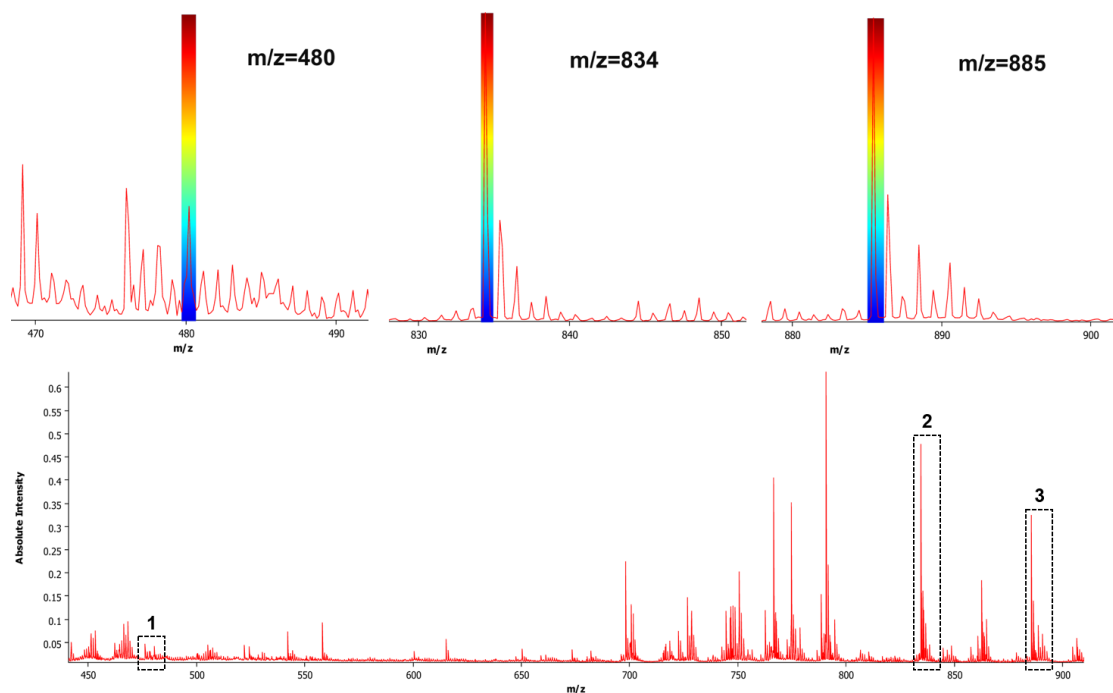

Figure S3. Negative ion mode mass spectrum of phospholipid molecules using a 1, 5-DAN hydrochloride matrix. Whole mass spectrometry ion peak map with  $m/z$  ranging from 450 to 900. Black rectangular areas in the whole mass spectrometry were amplified and displayed. 1: PE (18:0)  $m/z=480$ , 2: PS (18:0/22:6)  $m/z=834$ , 3: PI (18:0/20:4)  $m/z=885$ .

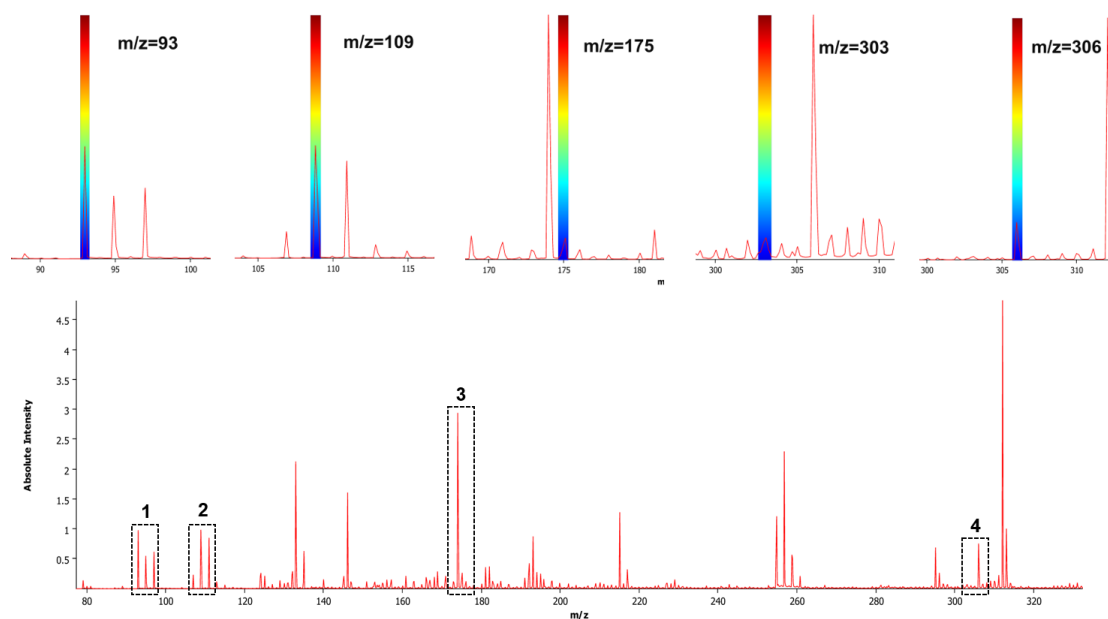

Figure S4. Negative ion mode mass spectrum of other metabolic molecules using a 1, 5-DAN hydrochloride matrix. Whole mass spectrometry ion peak map with  $m/z$  ranging from 80 to 320. Black rectangular areas in the whole mass spectrometry were amplified and displayed. 1:  $\text{Na}^+$   $m/z=93$ , 2:  $\text{K}^+$   $m/z=109$ , 3: Ascorbic acid  $m/z=175$ , 4: Arachidonic acid  $m/z=303$  and Glutathione  $m/z=306$ .
